# Supplementary material
Source: publisher figshare collection journal article supplement (https://acs.figshare.com/ndownloader/files/3710677)

## Supporting Information (SI)

# Thermal and *in Situ* X-ray Diffraction Analysis of a Dimorphic Co-crystal, 1:1 Caffeine-Glutaric Acid

*Venu R. Vangala,<sup>\*,†,‡</sup> Pui Shan Chow,<sup>\*,†</sup> Martin Schreyer,<sup>†</sup> Grace Lau,<sup>†</sup> and Reginald B. H.*

*Tan<sup>†,¶</sup>*

<sup>†</sup>Crystallization and Particle Science

Institute of Chemical and Engineering Sciences

A\*STAR (Agency for Science, Technology and Research)

1, Pesek Road, Jurong Island, Singapore, 627833.

<sup>‡</sup>Current Affiliation:

Centre for Pharmaceutical Engineering Science

School of Pharmacy, University of Bradford

Bradford BD7 1DP, United Kingdom

<sup>¶</sup>Department of Chemical & Biomolecular Engineering

National University of Singapore

4, Engineering Drive 4, Singapore 117576

**Figure S1.** TGA trace of for CA-GA polymorphic forms, Forms I and II. Note the absence of solvent molecules in these crystalline phases.

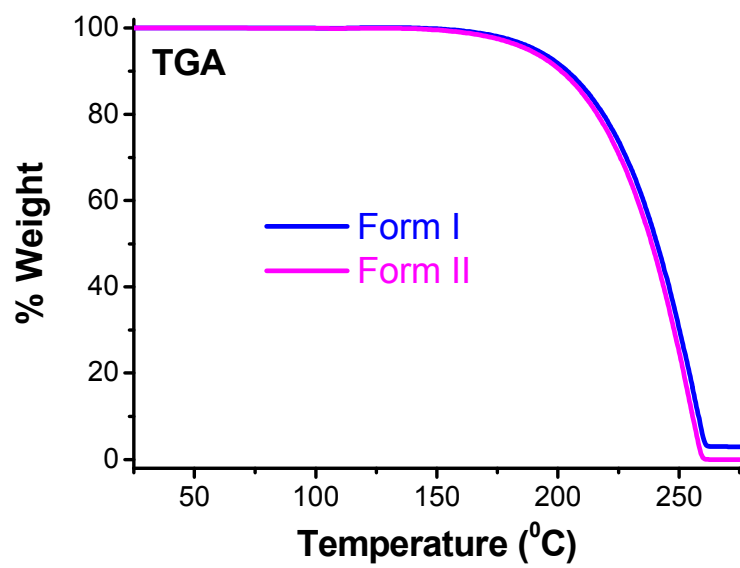

**Figure S2.** Variable temperature X-ray diffraction patterns of caffeine-glutaric acid Form II are shown in details.

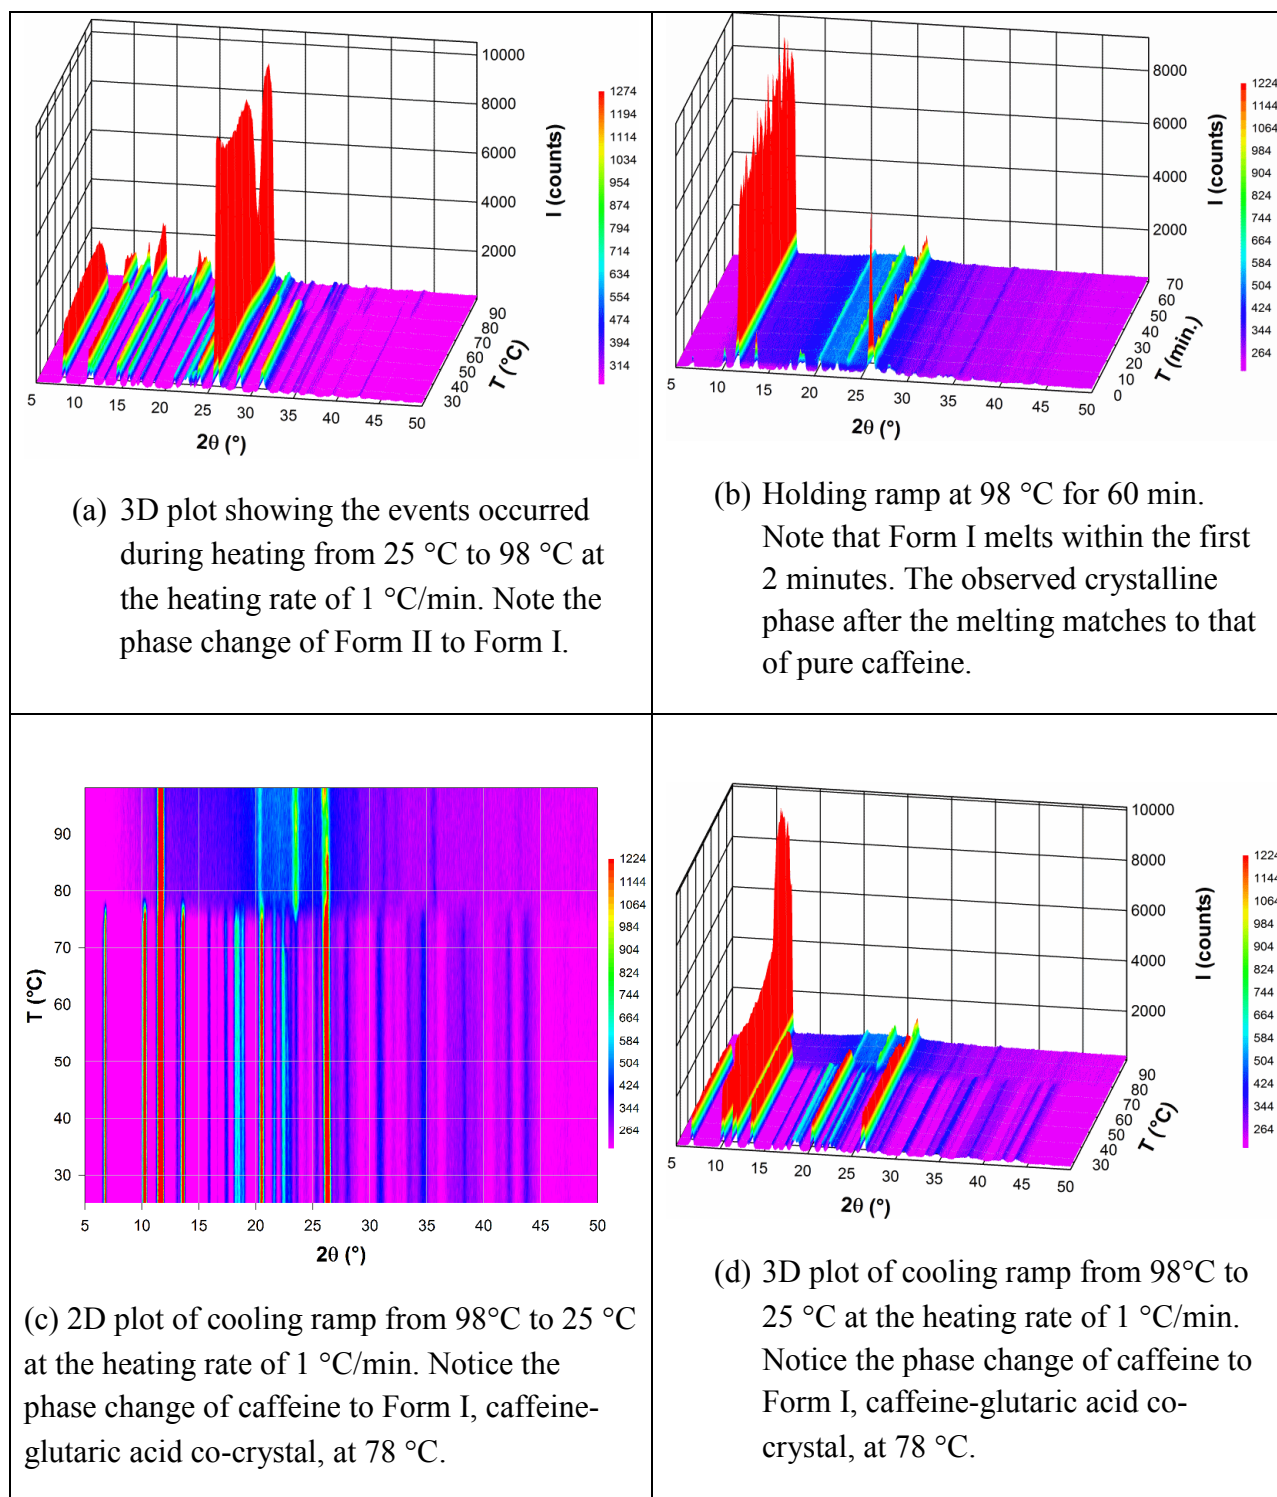

**Figure S3.** Variable temperature X-ray diffraction of caffeine-glutaric acid Form I from 25 °C to 95 °C at 1 °C/min. Next, it was held at 95 °C for 45 min. Subsequently, the sample was cooled to 25 °C at 1 °C/min.

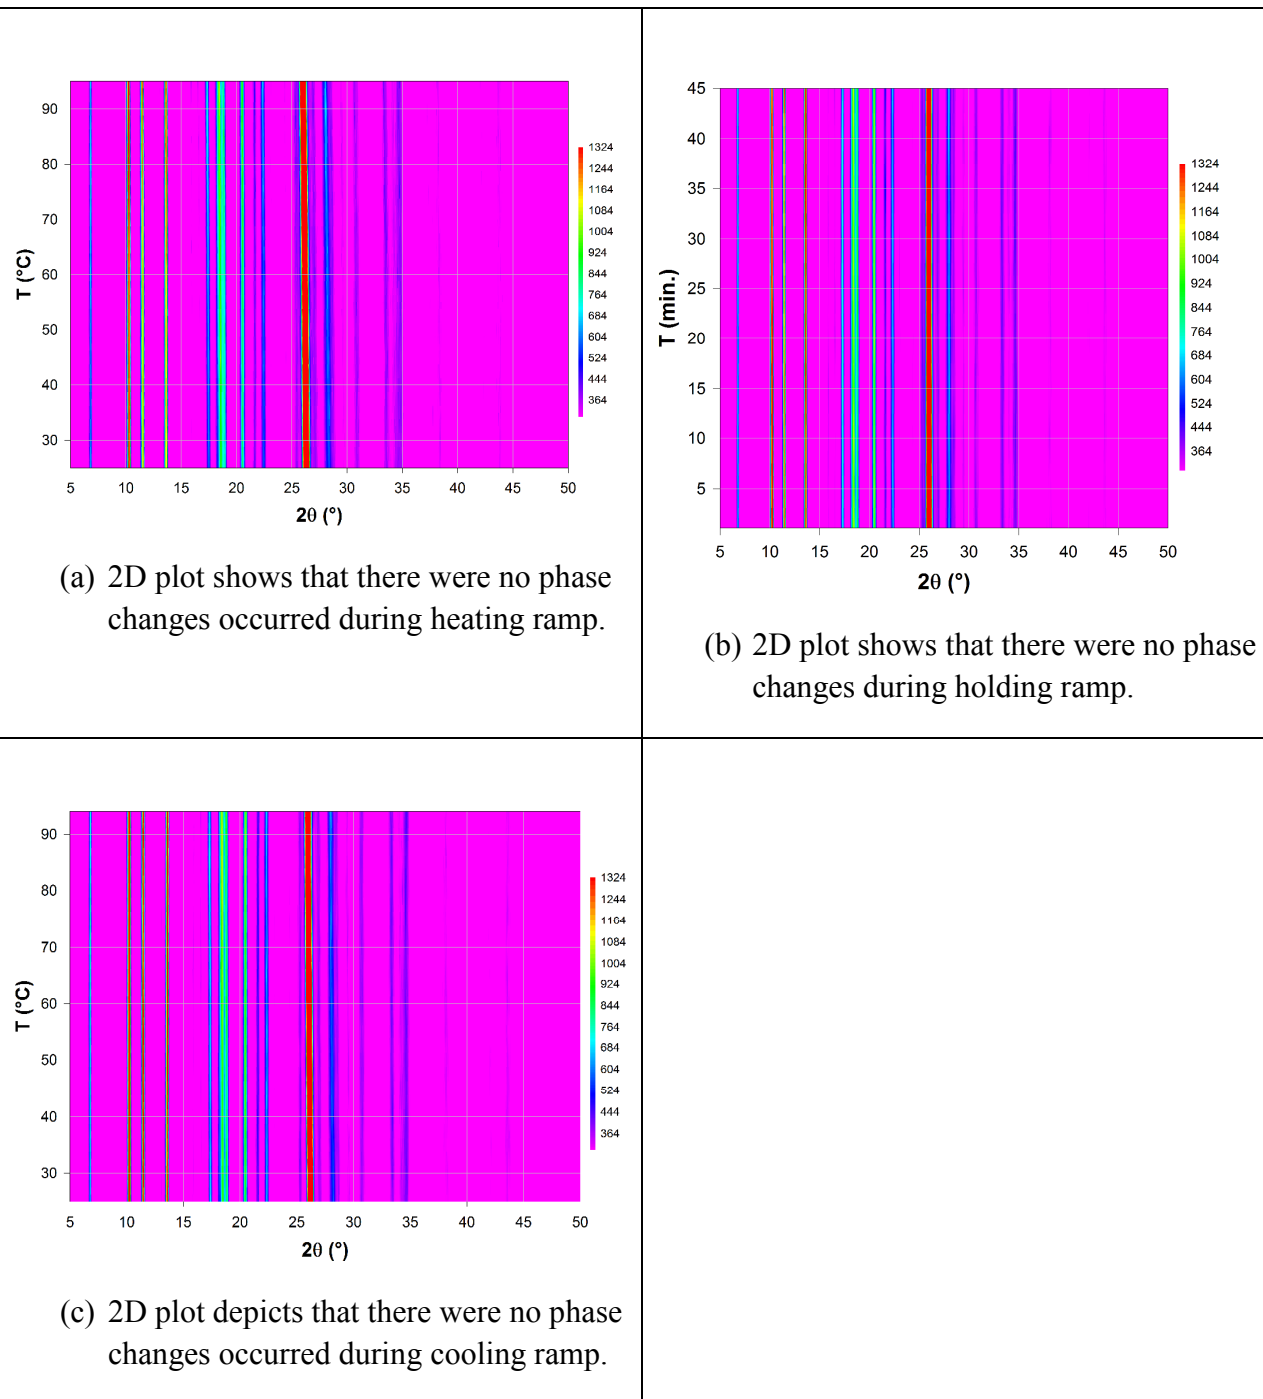

**Figure S4.** DSC heat-cool-heat profiles of CA-GA Form II at 10 °C/min heating rate. Heating cycle 1 involved heating of sample from room temperature to 170 °C and the melt was subjected to cooling cycle 1 (170 °C to -5 °C), which was followed by heating cycle 2 (-5 °C to 170 °C). The heating cycle 2 results suggest that Form II transformed to Form I during heating followed by melting of Form I at 98.2 °C which indicates that during cooling cycle 1, initially Form I was formed (VTXRD results support this) and upon further cooling to -5 °C, Form I could have converted to Form II. Hence, CA-GA dimorphs, Forms I and II, are enantiotropically related.

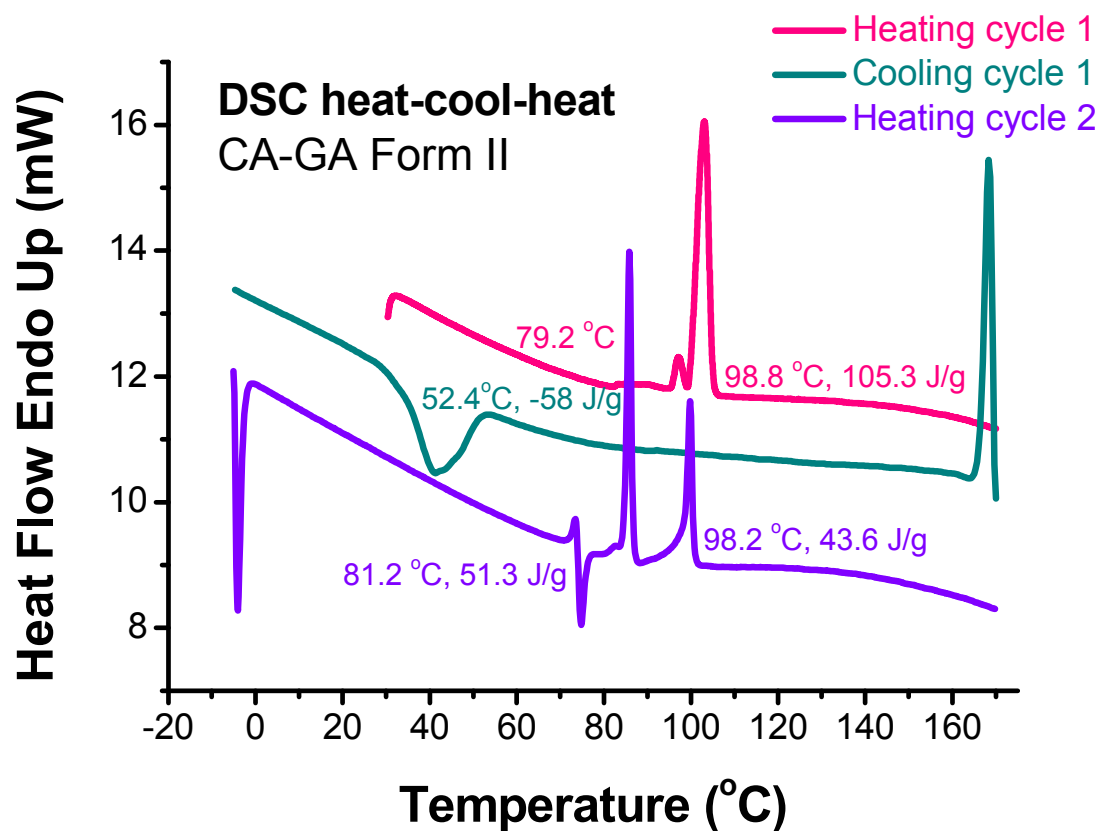

Supplement: Supplementary file 1 [file 3710677]
